# Supplementary material for: Novel continuous flow synthesis of Pt NPs with narrow size distribution for Pt@carbon catalysts
Source: Royal Society of Chemistry journal article supplement (doi:10.1039/c9ra08762a), 2020-01-01
Supplement: c9ra08762a1.pdf [file c9ra08762a1.pdf]

## **Electronic Supplementary Information**

### **Novel Continuous Flow Synthesis of Pt NPs with Narrow Size Distribution for Pt@Carbon Catalysts**

Ankit Singh, Keiko Miyabayashi\*

Department of Engineering, Graduate School of Integrated Science and Technology,  
Shizuoka University, Hamamatsu, 432-8561, Japan

#### **- Contents List-**

|                                                                                         |           |
|-----------------------------------------------------------------------------------------|-----------|
| <b>Fig. S1</b> TEM image of Pt NPs supported on non-treated carbon black (Vulcan XC72). | <b>S2</b> |
| <b>Fig. S2</b> TG-DTA curves for pure Pt NPs.                                           | <b>S2</b> |
| <b>Fig. S3</b> X-ray diffraction pattern of commercial catalyst.                        | <b>S3</b> |
| <b>Fig. S4</b> XPS of Survey(a) and Cl 2s(b) of Pt@C.                                   | <b>S3</b> |

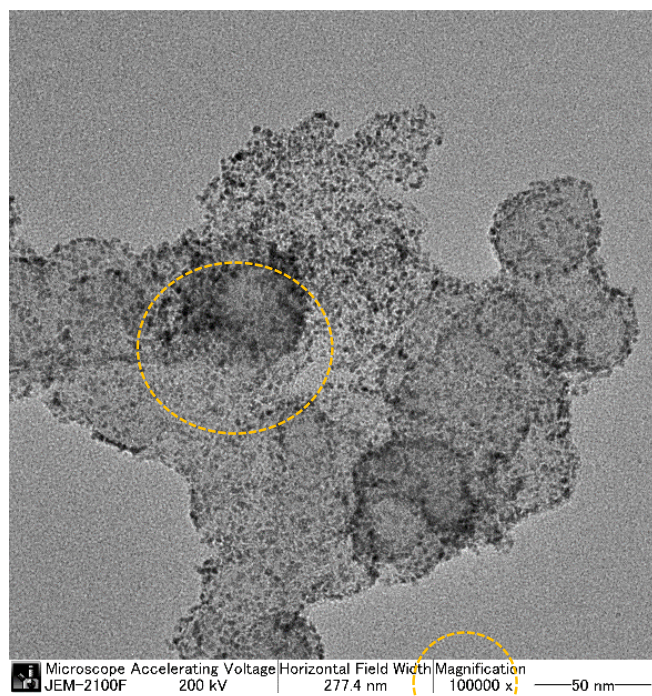

**Fig. S1** TEM image of Pt NPs supported on non-treated carbon black (Vulcan XC72) to show aggregation and irregular shaped nanoparticles on carbon.

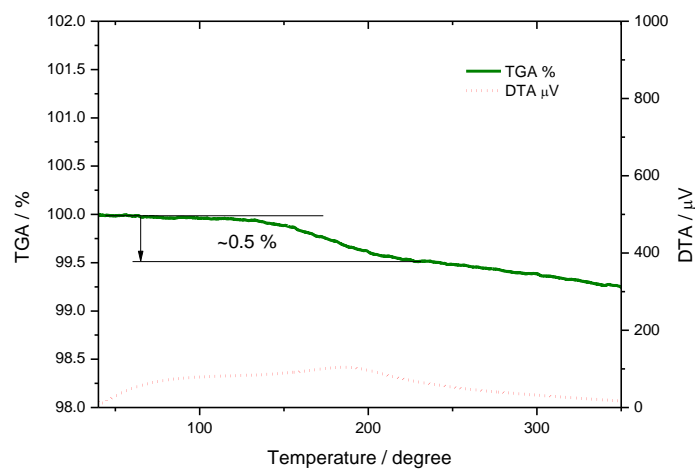

**Fig. S2** TG-DTA curves for pure Pt NPs.

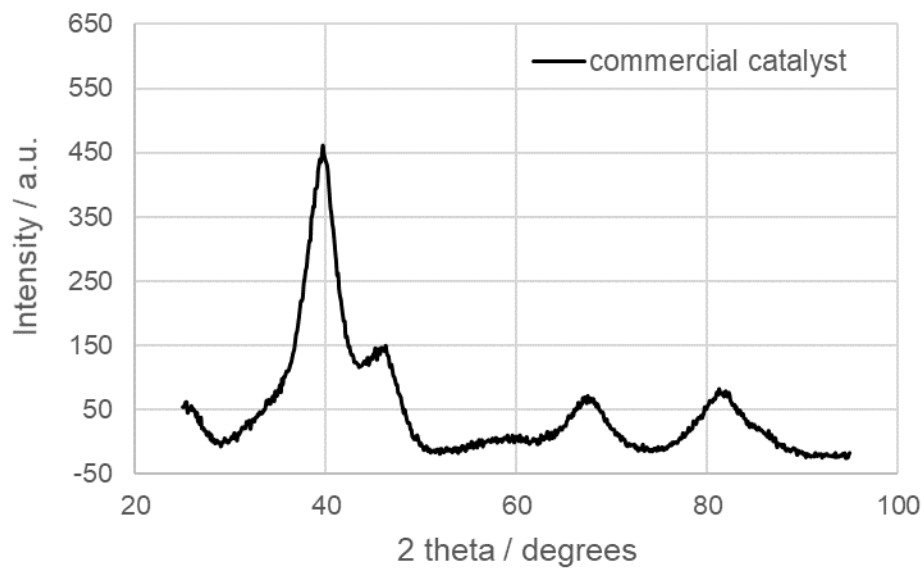

**Fig. S3** X-ray diffraction pattern of commercial catalyst.

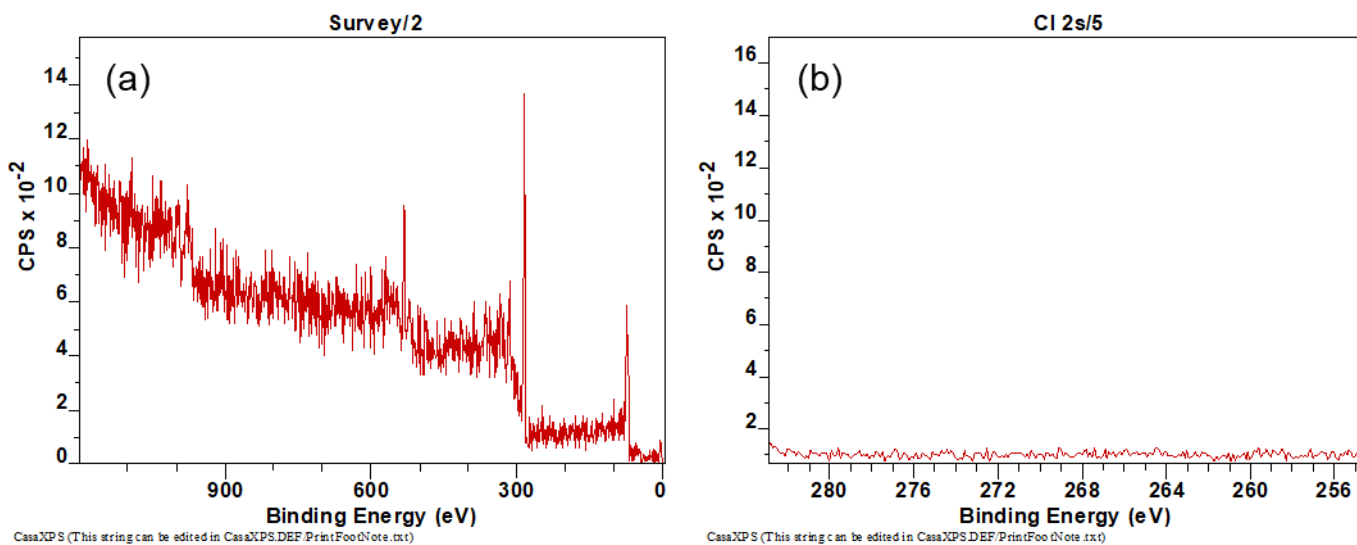

**Fig. S4** XPS of Survey(a) and Cl 2s(b) of Pt@C.
